# Supplementary material for: Antibodies against the Ebola virus soluble glycoprotein are associated with long-term vaccine-mediated protection of non-human primates
Source: PubMed Central journal article supplement — Cell Rep. Author manuscript; Available in PMC 2023 Oct 23. (PMC10576837; doi:10.1016/j.celrep.2023.112402), 2023-04-15

**Supplemental information**

**Antibodies against the Ebola virus soluble  
glycoprotein are associated with long-term  
vaccine-mediated protection of non-human primates**

**Bronwyn M. Gunn, Ryan P. McNamara, Lianna Wood, Sabian Taylor, Anush Devadhasan, Wenyu Guo, Jishnu Das, Avlant Nilsson, Amy Shurtleff, Sheri Dubey, Michael Eichberg, Todd J. Suscovich, Erica Ollmann Saphire, Douglas Lauffenburger, Beth-Ann Coller, Jakub K. Simon, and Galit Alter**

### Supplementary Figure Legends

Figure S1. Kinetics of vaccine vector do not differ between survivors and non-survivors, Related to Figure 1.

The copies per ml of plasma of challenged animals was determined by quantitative PCR at days 1, 2, and 3 post challenge. Open circles indicate animals that went on to survive challenge, and closed circles indicated animals that did not survive challenge.

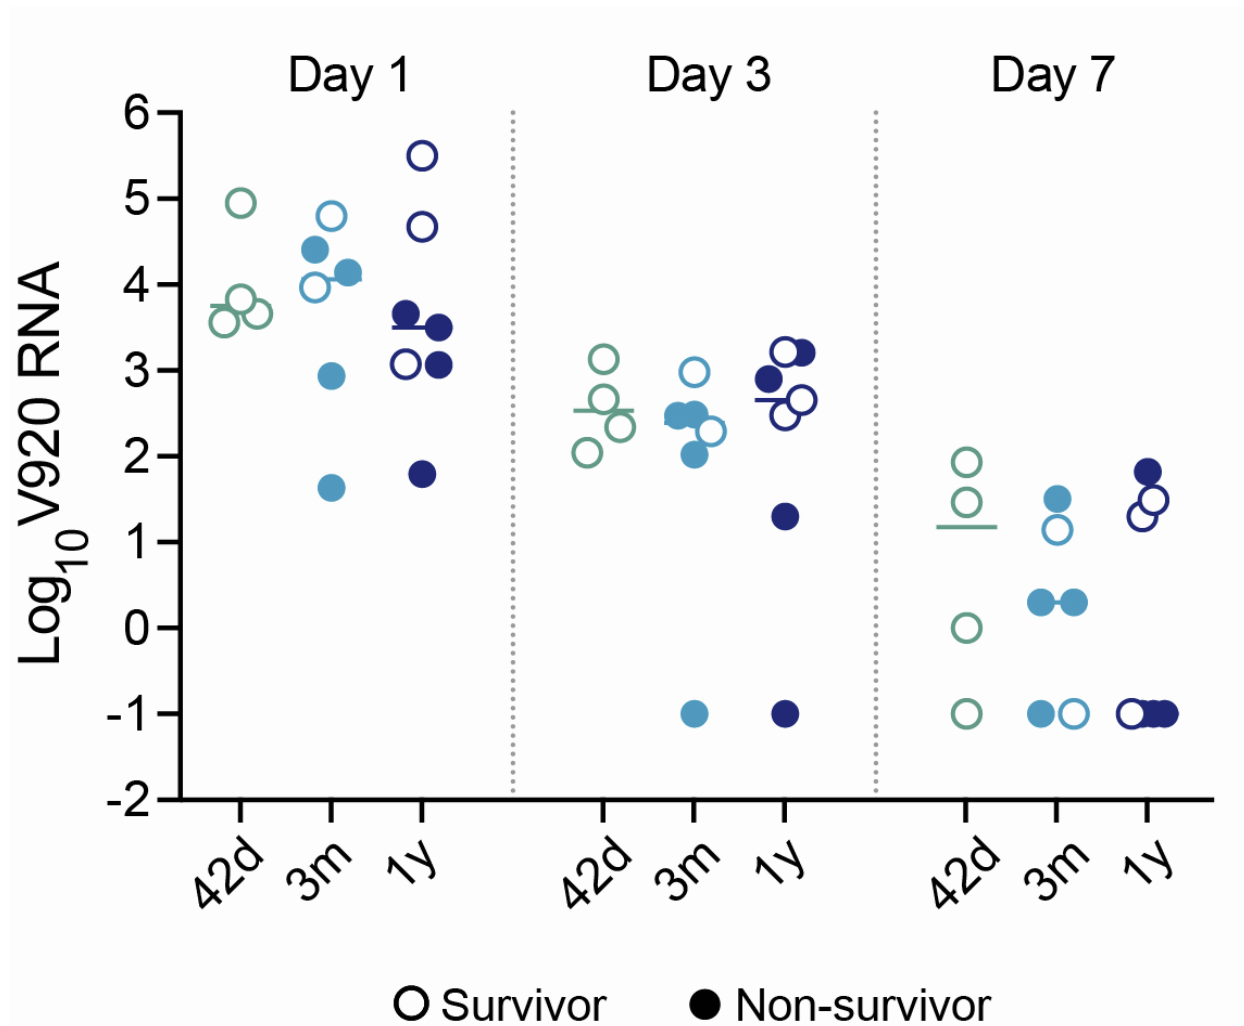

Figure S2. Binding of GP- and sGP-specific antibodies to human and rhesus Fc receptors, Related to Figure 3.

A. GP-specific antibody binding to human and rhesus Fc receptors were measured at indicated time points post-vaccination for vaccinated NHP that went on to survive challenge at 1 year (open circle; n=3) and NHP that did not survive challenge (closed circle; n=4). Statistical analysis was performed using two-way RM ANOVA with Sidak's multiple comparisons test.

B. sGP-specific antibody-mediated induction of the indicated innate immune effector functions were measured at indicated time points post-vaccination for vaccinated NHP that went on to survive challenge at 1 year (open circle; n=3) and NHP that did not survive challenge (closed circle; n=4). Statistical analysis was performed using two-way RM ANOVA with Sidak's multiple comparisons.

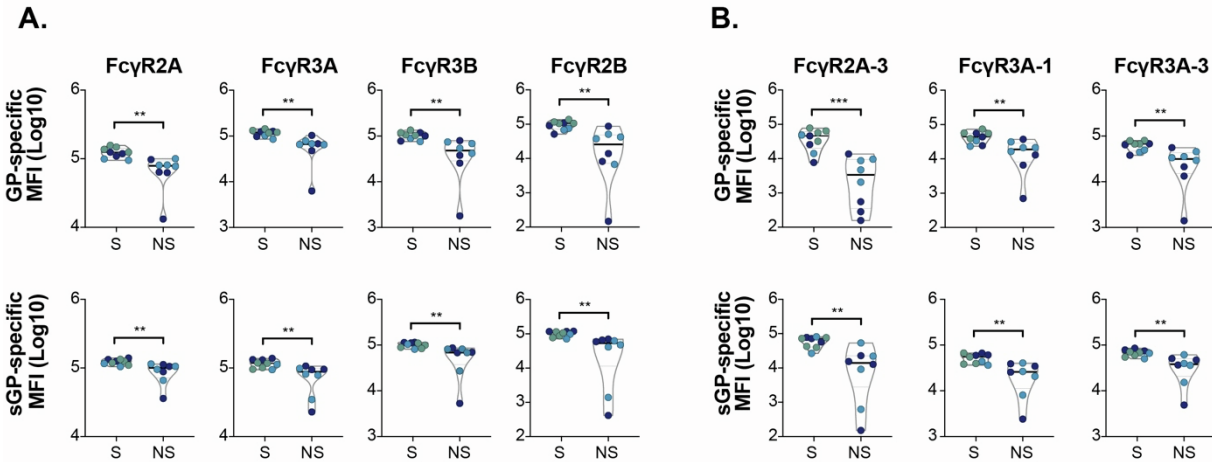

Supplement: NIHMS1897948-supplement-1.pdf [file NIHMS1897948-supplement-1.pdf]
